# 1 Leaf area index estimation of even-aged oak (*Quercus petraea*) forests using 2 in situ stand dendrometric parameters

3 Briere, M., François, C., Lebourgeois, F., Seynave, I., Vincent, G., Korboulewsky, N.,  
4 Ningre, F., Perot, T. and E. Dufrêne

## 5 **Abstract**

6 The leaf area index (LAI) is a key characteristic of forest stand aboveground net productivity (ANP), and many methods  
7 have been developed to estimate the LAI. However, every method has flaws, e.g., methods may be destructive, require  
8 means or time and/or show intrinsic bias and estimation errors.

9 A relationship using basal area (G) and stand age to estimate LAI was proposed by Sonohat et al. (2004). We used  
10 literature data in addition to data from measurements campaign made in the northern half of France to build a data set  
11 with large ranges of pedoclimatic conditions, stand age and measured LAI. We validated the Sonohat et al. (2004)  
12 relationship and attempted to improve or modify it using other stand/dendrometric characteristics that could be  
13 predictors of the LAI.

14 The result is a series of three models using the G, age and/or quadratic mean diameter (Dg), and the models were able to  
15 estimate the LAI of an oak only even-aged forest stand with good confidence (root mean square error, RMSE < 0.75)  
16 While G is the main predictor here, age and Dg could be used conjointly or exclusively given the available data, with  
17 variable precision in the estimations.

18 Although these models could not, by construction, relate to the interannual variability of the LAI, they may provide the  
19 theoretical LAI of an untouched forest (no meteorological, biotic or anthropogenic perturbation) in recent years.  
20 additionally, the use of this model may be more interesting than an LAI measurement campaign, depending on the  
21 means to be invested in such a campaign.

## 22 **Introduction**

23 Forest productivity in the near future is a subject of great concern (Lindner et al. 2010; Hanewinkel et al. 2013; Hurlbert  
24 et al. 2019), and the identification of functional traits, or their combination, connected to tree adaptation to climate  
25 change is still under debate (Bussotti et al. 2015). Aboveground net productivity (ANP) is driven by many intrinsic  
26 (e.g., light-use efficiency, drought resistance, leaf area, species composition) and extrinsic (e.g., nutrient availability,  
27 meteorology, topography, management) factors (Skovsgaard and Vanclay 2008). In this context, stand characteristics are

28 important variables to model ANP (Stage 1973; Peng 2000; Monserud 2003); canopy description is especially  
29 important, as it is the main interface between a tree and the atmosphere. Its description has been subject to research, and  
30 several descriptors have been proposed (Jonckheere et al. 2004; Parker 2020), such as the leaf area index (LAI)  
31 (Running and Coughlan 1988; Asner et al. 2003; Clark et al. 2008; Ollinger 2011; Parker 2020). The LAI is by far the  
32 main variable used to describe a canopy, and is one of the main factors influencing the ANP of forest stands (Fassnacht  
33 and Gower 1997; Barr et al. 2004; Reich 2012).

34 The LAI is defined as half the total leaf area developed by the vegetation reported on the land surface occupied by this  
35 vegetation (Chen and Black 1992). The LAI is an important value used to estimate the water and radiative budget of a  
36 forest stand and thus stand productivity (Running and Coughlan 1988; Landsberg and Waring 1997; Pietsch et al. 2005).  
37 The LAI has a great impact on forests since higher LAI values indicates greater transpiration and greater rain  
38 interception than lower LAI values (Bréda and Granier 1996; Granier et al. 1999; Yan et al. 2012). Considering the  
39 radiative budget, a lower LAI indicates less sunlight absorption, which would have two direct effects: (i) lower  
40 photosynthetic activity leading to decreases in tree productivity and (ii) higher production of understorey vegetation  
41 (Granier et al. 1999), leading to the development of understorey vegetation, often accompanied by higher  
42 evapotranspiration and competition for soil water (Black et al. 1989). Quantitatively speaking, some studies have  
43 proposed linear relationships between ANP and LAI with linear factors of 0.3 to 1.9 Mg·ha<sup>-1</sup>·year<sup>-1</sup> per LAI unit  
44 (Fassnacht and Gower 1997; Asner et al. 2003; Parker 2020) or a logistic relationship (Jokela et al. 2004).

45 Nevertheless, LAI measurements require the implementation of heavy protocols. LAI measurement methods are divided  
46 into two main categories: (i) direct methods, implying a measurement of leaf area, which can be used to define an  
47 allometric relationship to extend the measure made on a subsample to the whole sample (in which case, the term  
48 semidirect method is preferred) and (ii) indirect methods, which consist of the analysis of the light under the canopy  
49 with the assumption of spatial and angular distribution of leaves (Dufrêne and Bréda 1995; Bréda 2003; Jonckheere et  
50 al. 2004; Weiss et al. 2004).

51 Among direct methods, **litter traps** are often considered as reference (Dufrêne and Bréda 1995; Mussche et al. 2001;  
52 Bréda et al. 2002; Bréda 2003). This method consists of the placement, of mesh-bottomed (or, at least, draining  
53 material) collectors of determined size, shape and height just above the ground, and these traps collect leaves during the  
54 leaf fall season (Morrison 2011). This method requires the installation of enough litter traps and regular collection  
55 during the leaf fall season; additionally, samples require sorting, weighting and measuring the leaf surface of the litter  
56 collected to avoid the loss of material by decomposition or degradation (Bréda et al. 2002; Bréda 2003; Eriksson et al.  
57 2005). A common semidirect method based on **allometry** consists of the construction of a relationship between easily

58 measurable tree characteristics such as diameter at breast height or stem basal area and the leaf surface of the tree  
59 (Bartelink 1997; Le Dantec et al. 2000). However, this method requires cutting down the selected trees and collecting  
60 and measuring all of the tree's leaves. The relation between the measured variables and leaf area is then applied to the  
61 other trees of the stand, and the total leaf area is estimated. A third method, **inclined point quadrats**, is applicable only  
62 for herbaceous stands and consists of planting a thin probe regularly in the leaf coverage and counting the contacts  
63 between the probe and the leaves (Wilson 1960).

64 Finally, the **needle method** is derived from the inclined point quadrats method applied for deciduous trees at the end of  
65 fall when all leaves are on the ground. Under these conditions all leaves are horizontal and flat, and the probe is vertical.  
66 In this case, the number of contact points between the probe and the leaves is locally equal to the LAI. The mean value  
67 of a large number of measurements in a forest stand gives the mean LAI of the stand (Bréda et al. 2002; Bréda 2003).

68 Indirect methods use light as a tool to estimate the LAI and rely on two theories: gap fraction and gap size distribution  
69 (Chen and Cihlar 1995). The simplest application of these theories is to measure sun flecks on the ground multiple  
70 times a day. The proportion of sunlit ground over time (gap fraction) or the distribution of the sizes of this fleck (gap-  
71 size distribution) can provide enough information to estimate the LAI (Welles 1990; Welles and Cohen 1996). An  
72 evolution of this method is the **digital hemispherical photography (DHP)**. With a shaded canopy and a  
73 homogeneously lit the sky (during dawn or dusk or a cloudy day), it is possible to distinguish sky (lightened areas) from  
74 the leaves (dark areas). Using gap fraction or gap-size distribution theories, it is possible to estimate the LAI (Weiss et  
75 al. 2004). Many instruments use these theories to indirectly measure the LAI under different types of canopies (from  
76 prairies to forests), such as the **Licor LAI-2000**, the Demon, the Plant Canopy Imager, or a smartphone with the  
77 "Pocket LAI" application (Bréda et al. 2002; Jonckheere et al. 2004; Casa et al. 2019).

78 Finally, other methods based solely on modelling allow the estimation of the LAI (Running and Gower 1991; Pietsch et  
79 al. 2005; Guillemot et al. 2017). This approach allows the models to estimate the interannual variation in the LAI and,  
80 thus, the variation in the energy, water and carbon budget of the stand. Application to a real stand would require some  
81 variable that is easily accessible using a model but harder to access in a real-life forest stand (i.e., net assimilation of  
82 carbon or quantity of available soil water).

83 None of these techniques are perfect and each has flaws. While litter trapping and allometry can distinguish the specific  
84 LAI of different tree species in the canopy, indirect methods cannot (Bréda 2003). For an LAI higher than 5,  
85 instruments using gap fraction theory show a saturation in the measurements (Gower et al. 1996). Some direct or  
86 semidirect methods require either destructive measurements of trees or the installation of materials on the stand (litter  
87 traps, sensors and data acquiring unit) while others require a large amount of time spent on the stand to achieve a

88 correct sampling. This large amount of required effort and/or time may lead to subsampling and, thus, a biased  
89 estimation of the measured LAI. Last, assumptions are made for each of these methods, especially for indirect ones, and  
90 they must be considered when considering the results because these assumptions are often not verifiable.

91 LAI values are difficult to estimate directly, and it appears important, as an alternative to measurements, to develop a  
92 relationship linking the LAI to common stand parameters through simple empirical relationships. Sonohat et al. (2004)  
93 developed such a relationship to estimate the LAI of a coniferous stand using the assumption of an age-dependent  
94 relationship between the basal area (G) and LAI. Based on this study, we propose several adaptations of this relationship  
95 to improve the LAI estimation for even-aged oak stands using dendrometric stand data: G, stand age and/or quadratic  
96 mean diameter (Dg). To establish and validate our relationships, different data sets were compiled, including an LAI  
97 measuring campaign, using the needles method, through northern France during the winters of 2018-2019 and 2019-  
98 2020 (35 plots distributed on 13 sites); this campaign was supplemented by 86 published measures (distributed on 44  
99 sites) from the literature (Le Dantec et al. 2000; Balandier et al. 2006) and 22 measures (distributed on 4 sites) from  
100 personal correspondence, resulting in a total of 145 measures (See Appendix 1).

## 101 **Material and Methods**

### 102 ***LAI measurement and estimation***

#### 103 *Summary of the data sets*

104 A total of 145 data points were considered in our study and came from different datasets. This compiled dataset covered  
105 a wide range of densities (Relative Density Index (relative density index (RDI) (Reineke 1933; Le Goff et al. 2011; Le  
106 Mogue dec and Dh te 2012)): 0.18 to 1.37; mean = 0.65) and ages (10 to 220; mean = 110 years). This thorough  
107 approach is quite an achievement since only a few LAI measurement data are available on pure *Q. petraea* stands and  
108 fewer data sets contain stand-related variables such as G or tree densities. The ranges [min-max (mean) ] of G, Dg and  
109 LAI were 6.9-49 (21.6) m<sup>2</sup>/ha, 2.8-80.9 (36.1) cm and 0.4-5.6 (3.1) m<sup>2</sup>/m<sup>2</sup>, respectively (see Appendix 1).

110 The LAI was measured by either a direct or an indirect method: litter-trap followed by leaf surface measurements,  
111 needle method, DHP, transmittance and LAI-2000 (see Appendix 1).

## 112 *Description of the needle method*

113 The needle method is derived from the inclined quadrat points (Wilson 1960). This derivation implies flat horizontal  
 114 leaves and a vertical thin probe. For this measurement we used a square-shaped (~10×10cm) plastic plate pierced by a  
 115 hole (diameter = 0.8 mm) on its centre and a thin (diameter = 0.8 mm, 20 cm) long steel needle (piano string) as the  
 116 probe. For the measurement of each plot, at least two transects (usually diagonals) were planned. The distance between  
 117 throws was estimated on site to cover the length of the whole transects and we obtained between 117 and 163 (mean =  
 118 134) local LAI measurements.

119 Along this transect, plastic plates were thrown to the soil (backwards to ensure minimization of the operator effect on  
 120 the measurement). For each throw, the plate was pushed flat, and litter was stabbed through the plate's centre hole. The  
 121 plates were then carefully picked up and flipped over. As stated by (Parker 2020) "In the idealized concept, LAI is the  
 122 number of leaves above a single point, that contact an infinitely thin vertical line". Each contact point, defined by the  
 123 occurrence of the probe passing through or touching the border of a leaf, is counted, identified to the leaf species and  
 124 recorded down. The main limitations of this technique are the shape of the leaf and the diameter of the probe. A large  
 125 probe diameter and/or a leaf showing a high perimeter over area ratio might increase the border effect and may bias the  
 126 measurement. The diameter of the probe (0.8 mm diameter stainless steel piano chord) and the shape of the oak leaves  
 127 minimize bias. The LAI of the stand is computed, and then the mean value of all stabs can be discriminated by species.  
 128 For practical reasons, the two most frequent species in each stand were distinguished, and other species were pooled  
 129 into the "other category". The data resulting from this measurement campaign are detailed in Table 1 (details available  
 130 in Appendix 2). Over this measurement campaign, an average of 139 local LAI measurement were done each of the 35  
 131 experimental plots (total = 4809, mean value = 3, mean error on measurement = 0.4) (more details are supplied in the  
 132 Appendix 2).

*Table 1: Summary of LAI measures using the needles technique. The LAI is the mean value of all measurements on each plot.*

| Network  | Site           | plot | Latitude | Longitude | RDI  | Age <sub>2018</sub><br>(years) | Density<br>(N. ha <sup>-1</sup> ) | G<br>(m <sup>2</sup> . ha <sup>-1</sup> ) | Dg<br>(cm) | LAI<br>(m <sup>2</sup> . m <sup>-2</sup> ) |
|----------|----------------|------|----------|-----------|------|--------------------------------|-----------------------------------|-------------------------------------------|------------|--------------------------------------------|
| ICOS     | Barbeau        |      | 48.4764  | 2.7801    | 0.56 | 134                            | 119                               | 22.2                                      | 38.1       | 3.1                                        |
| GIS Coop | Darney-Sessile | 1    | 48.0954  | 6.1316    | 0.22 | 32                             | 168                               | 7.7                                       | 23.9       | 1.8                                        |
| GIS Coop | Darney-Sessile | 2    | 48.0954  | 6.1316    | 0.89 | 32                             | 1627                              | 25.7                                      | 14.5       | 2.4                                        |
| GIS Coop | Darney-Sessile | 3    | 48.0954  | 6.1316    | 0.87 | 33                             | 1585                              | 24.6                                      | 14.4       | 2.9                                        |
| GIS Coop | Darney-Sessile | 4    | 48.0954  | 6.1316    | 0.42 | 33                             | 548                               | 13.5                                      | 17.6       | 2.5                                        |
| GIS Coop | Grosbois       | 1    | 46.4999  | 2.9930    | 0.47 | 37                             | 656                               | 14.9                                      | 16.9       | 3.5                                        |
| GIS Coop | Montrichard    | 2    | 47.3751  | 1.1784    | 1.33 | 33                             | 3065                              | 25.7                                      | 10.3       | 3.5                                        |
| GIS Coop | Montrichard    | 4    | 47.3751  | 1.1784    | 0.50 | 35                             | 916                               | 14.9                                      | 14.4       | 2.7                                        |

|          |                     |    |         |        |      |     |      |      |      |     |
|----------|---------------------|----|---------|--------|------|-----|------|------|------|-----|
| GIS Coop | Montrichard         | 5  | 47.3751 | 1.1784 | 0.85 | 32  | 2470 | 22.4 | 10.6 | 2.7 |
| GIS Coop | Moulins-Bonsmoulins | 1  | 48.6956 | 0.5187 | 0.64 | 25  | 974  | 12.8 | 12.8 | 3.2 |
| GIS Coop | Parroy              | 1  | 48.6702 | 6.6523 | 1.11 | 41  | 1451 | 29.9 | 17.6 | 3.7 |
| GIS Coop | Parroy              | 2  | 48.6702 | 6.6523 | 0.85 | 40  | 963  | 25.3 | 19.1 | 3.1 |
| GIS Coop | Parroy              | 3  | 48.6702 | 6.6523 | 0.35 | 40  | 120  | 11.3 | 38.5 | 3.4 |
| GIS Coop | Parroy              | 4  | 48.6702 | 6.6523 | 0.22 | 39  | 100  | 10.0 | 32.3 | 3.0 |
| GIS Coop | Reno-Valdieu        | 1  | 48.5276 | 0.6780 | 0.51 | 52  | 339  | 18.2 | 26.3 | 2.7 |
| GIS Coop | Reno-Valdieu        | 2  | 48.5276 | 0.6780 | 1.27 | 52  | 1389 | 33.4 | 19.5 | 2.9 |
| GIS Coop | Reno-Valdieu        | 3  | 48.5276 | 0.6780 | 0.70 | 51  | 669  | 22.3 | 21.2 | 2.9 |
| GIS Coop | Reno-Valdieu        | 4  | 48.5276 | 0.6780 | 0.25 | 52  | 120  | 10.1 | 31.8 | 2.5 |
| GIS Coop | Tronçais            | 1  | 46.6636 | 2.7072 | 0.45 | 56  | 333  | 16.3 | 24.5 | 3.2 |
| GIS Coop | Tronçais            | 2  | 46.6636 | 2.7072 | 0.24 | 57  | 129  | 9.1  | 29.6 | 3.0 |
| GIS Coop | Tronçais            | 3  | 46.6636 | 2.7072 | 1.04 | 55  | 1345 | 30.6 | 17.7 | 3.6 |
| OPTMix   | O12                 | 2  | 47.7737 | 2.5755 | 0.37 | 76  | 294  | 12.8 | 23.6 | 3.4 |
| OPTMix   | O12                 | 3  | 47.7737 | 2.5755 | 0.62 | 76  | 500  | 21.5 | 23.4 | 3.8 |
| OPTMix   | O214                | 1  | 47.8081 | 2.4468 | 0.60 | 68  | 604  | 19.9 | 20.5 | 3.9 |
| OPTMix   | O214                | 2  | 47.8081 | 2.4468 | 0.37 | 68  | 280  | 12.8 | 24.1 | 3.3 |
| OPTMix   | O593                | 1  | 47.9127 | 2.3012 | 0.62 | 67  | 425  | 21.9 | 25.6 | 4.0 |
| OPTMix   | O593                | 2  | 47.9127 | 2.3012 | 0.34 | 67  | 192  | 12.6 | 28.9 | 3.6 |
| Silva    | Blois               | 1  | 47.5705 | 1.2573 | 0.37 | 129 | 85   | 16.1 | 49.1 | 2.7 |
| Silva    | Blois               | 2A | 47.5705 | 1.2573 | 0.24 | 129 | 104  | 9.3  | 49.2 | 2.3 |
| Silva    | Blois               | 2B | 47.5705 | 1.2573 | 0.52 | 129 | 377  | 18.1 | 36.1 | 2.5 |
| Silva    | Blois               | 3  | 47.5705 | 1.2573 | 0.86 | 129 | 278  | 34.7 | 39.9 | 2.5 |
| Silva    | Blois               | 4  | 47.5705 | 1.2573 | 0.65 | 129 | 184  | 27.1 | 43.3 | 2.5 |
| Silva    | Tresor              | 1  | 46.6703 | 2.7224 | 1.02 | 139 | 329  | 41.4 | 40.0 | 3.4 |
| Silva    | Tresor              | 2  | 46.6703 | 2.7224 | 0.85 | 139 | 279  | 34.2 | 39.5 | 3.0 |
| Silva    | Tresor              | 3  | 46.6703 | 2.7224 | 0.62 | 139 | 152  | 26.3 | 47.0 | 2.8 |

133 To assess the required sampling effort and the performance of the needle method, we performed a study based on a  
134 representative distribution of leaf contact points. For this purpose, we assumed that the actual measurements made  
135 along the transects were representative of the whole plot. Then, a distribution function was fitted to match the  
136 distribution of measurements (Figure 1).

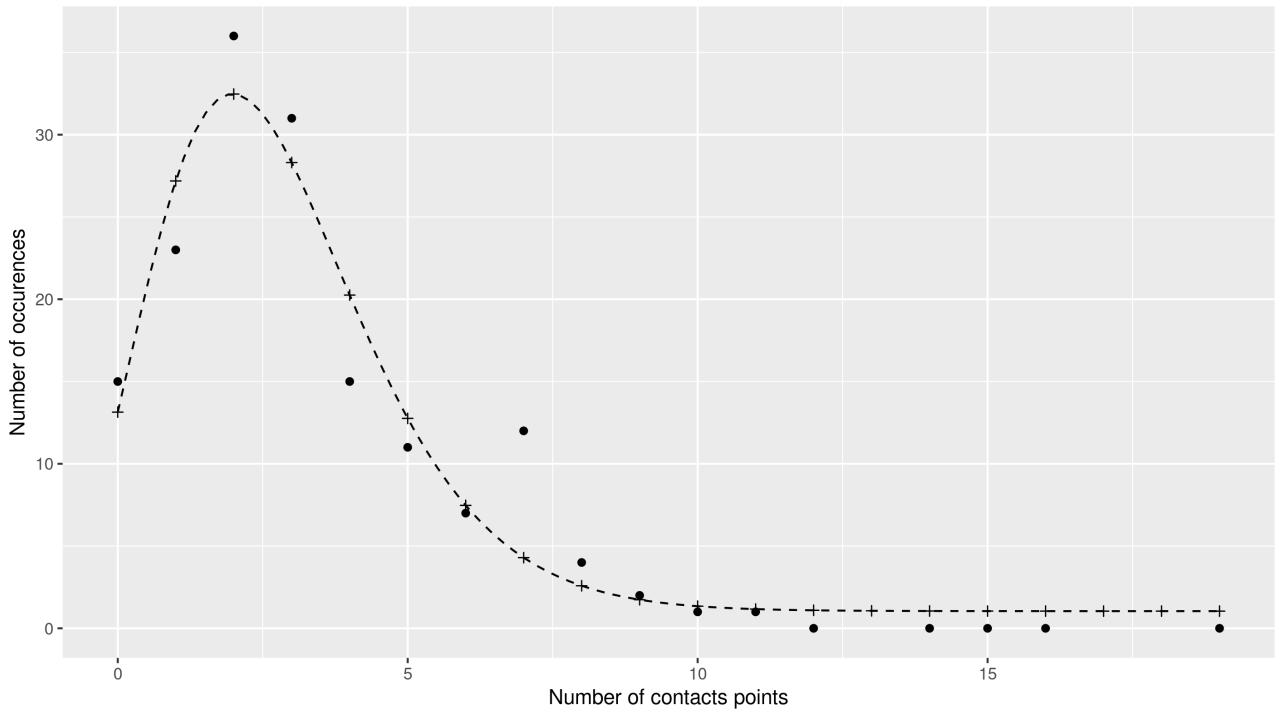

Figure 1: Occurrences of the local LAI values observed for a typical plot (distributions local LAI measurements for each plot is available in Appendix 3). Points are the field data while crosses represents the values obtained by the application of the function fitted.

137 This distribution has been used to generate a virtual sample of ten thousand measurements, and several sampling  
 138 schemes have been studied. For each simulated sampling effort (from  $n=1$  to  $n=500$ ), a thousand random draws (with  
 139 replacement) were generated in this virtual sample to evaluate the mean dispersion given the number of throws (sample  
 140 size) made.

#### 141 *Determination of oak-only LAI from stand LAI when indirect methods are used*

142 One of the main drawbacks of indirect methods is their inability to distinguish between species when measuring the  
 143 LAI. In their study, (Genet et al. 2010) proposed a model to estimate the LAI belonging to oaks in a mixed stand (*Q.*  
 144 *pertaea* and *Fagus sylvatica* L.) (Eq. (1)).

$$LAI_{Quercus} = LAI_{Stand} \cdot \left[ -0.0661 \cdot \left( 1 - e^{\frac{2.78 \cdot G_{Quercus}}{G_{Total}}} \right) \right] \quad (1)$$

145  
 146 where  $LAI_{Quercus}$  and  $LAI_{Stand}$  are the LAIs of oaks only and of the whole stand, respectively, and  $G_{Quercus}$  and  $G_{Total}$  are the  
 147 basal areas of oaks only and of the whole stand, respectively.

## 148 *Computation of LAI from measured transmittance*

149 It appears that a subset of our gathered database was comprised of below-canopy transmittance measurements (instead  
150 of LAI measurements). To convert these transmittances into LAI estimations we used a modelization and look-up table  
151 (LUT) approach. The estimation of the transmittance by the canopy can be approached using the Beer-Lambert  
152 relationship with an extinction coefficient relative to the LAI (Eq. (2)). The extinction coefficient includes leaf optical  
153 properties, leaf angle distribution and a clumping index (Vose et al. 1995; Cannell and Grace 2011). To estimate this  
154 extinction coefficient, we used the scattering by arbitrarily inclined leaves (SAIL) model (Verhoef 1984) in a multilayer  
155 version as described in Dufrêne et al. (2005). In this implementation, the canopy is divided into a stack of discrete  
156 layers. Each layer has a depth of 0.2 LAI unit (a forest with LAI=6 therefore has 30 layers). In our version of the SAIL  
157 model, the woody parts of the canopy are estimated to represent 0.9 LAI units (Dufrêne and Bréda 1995; Cutini et al.  
158 1998). The radiation extinction and diffusion of each single layer (elementary reflectances and transmittances) are based  
159 on the SAIL model (Verhoef 1984, 1985).

160 The transmittances were then computed for a whole range of LAI values (1.1 - 8) under specific conditions (80%  
161 diffuse radiation, day 185, average between 10 am and 4 pm, according to the measurement conditions described in  
162 Balandier et al., 2006. An extinction coefficient (k) was then fitted using the Beer-Lambert law to obtain a relationship  
163 between transmittance and LAI:

$$T_{\lambda} = e^{-k \cdot LAI} \Leftrightarrow k = \frac{-\ln(T_{\lambda})}{LAI} \quad (2)$$

164  
165 This relationship allows for the transformation of measured transmittance values into LAI estimations through a (LUT)  
166 between transmittances and LAI.

## 167 ***Experimental design and data collecting***

168 A campaign of LAI measurements using the needle method was carried out during the winters of 2018-2019 and 2019-  
169 2020 at 13 even-aged sessile oak (*Quercus petraea* (Matt.) Liebl.) experimental sites distributed over the northern half  
170 of France (see circles in Figure 2 and Table 1, supplementary data in Appendix 2). Each site was composed of plots  
171 with different stand density treatments: overall, 35 plots were measured.



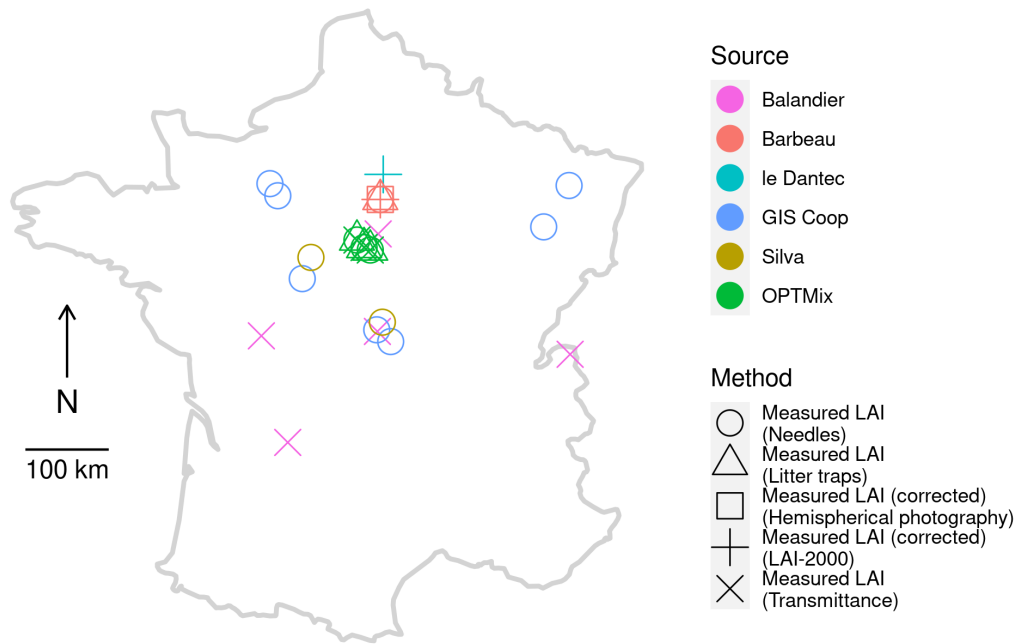

Figure 2: Locations of LAI measurements summarized in Table 1. Colors represents either the origin of the data or the network managing the experimental plots on which needles measurements have been made. The shape represents the method used to measure the LAI on each plot.

172 The needle method was used on all sites labelled here as Silva, GISCoop, OPTMix and Barbeau. The method allowed  
173 us to count the leaves according to their species and therefore to estimate the oak's LAI, excluding other species. The  
174 characteristics of each plot are presented in Table 1.

### 175 *Experimental sites 1: UMR Silva*

176 The LERFoB oak-permanent-plot network, which consists of thinning trials, aimed at analysing the effects of  
177 competition on tree growth and stand production in even-aged, naturally regenerated sessile oak (*Q. petraea*), stands  
178 across northern France

179 It was installed between 1925 and 1956, in five forest areas, in mostly pure even-aged stands, on soils favourable to  
180 oak growth; these factors could be assessed by the dominant height, which corresponded to a medium to good site index  
181 (Duplat and Tran-Ha 1997). This network covers a significant part of the sessile oak distribution in continental France.

182 This network of long-term experiments, which is still being monitored, covers a wide range of silvicultural treatments  
183 and presented contrasted initial ages, between 27 and 121 years (Oswald 1981). Different thinning intensities were  
184 compared in each trial.

185 The sampled plots were chosen at two sites where the largest differences, in RDI value, were observed: Sablonnières  
186 (Blois State Forest) and Trésor (Tronçais State Forest) (Table 1, supplementary data in Appendix 1).

## 187 *Experimental sites 2: GIS Coop*

188 The GIS Coop network has a wide geographical spread across the northern half of France (Seynave et al. 2018). For  
 189 each site, at least three experimental plots were present with different stand densities: from free growth ( $RDI_{goal} < 0.2$ ) to  
 190 self-thinning densities ( $RDI_{goal} > 0.9$ ) with intermediate values ( $RDI_{goal} \approx 0.25$  and  $RDI_{goal} \approx 0.5$ ) and variable  $RDI_{goal}$   
 191 (ascending or descending values with time). This experimental design provided a wide range of basal areas (from 7.7 to  
 192  $33.4 \text{ m}^2 \cdot \text{ha}^{-1}$ ), with particularly very low values, and allowed us to decorrelate stand age and stand dendrometric data  
 193 (Dg, G and N). The plots were from 25 to 57 years old at the time of measurements (Table 1, supplementary data in  
 194 Appendix 1).

195 The presence and density of the understorey varied with site and treatment. Low-density treatments often showed higher  
 196 understorey density than high-density treatments. This understorey is regularly controlled to limit its development.

## 197 *Experimental sites 3: OPTMix*

198 The three OPTMix sites were all located in the Orléans state forest and presented each two density treatments with  
 199 objective  $RDI_{goal} \approx 0.4$  and  $\approx 0.6$  (Table 1). The understorey was absent and every species other than *Q. petraea* was  
 200 removed. In addition to our measures using the needle method, LAI measurements were made on OPTMix plots for the  
 201 2018 vegetation season year using litter traps and global radiation transmittance (Table 2) (Korboulewsky et al. 2015;  
 202 Perot et al. 2019)

*Table 2: Data from the OPTMix network. All values necessary for estimating the LAI using our model, (G, age, Dg), plus additional information (Density), are given. The columns marked with a star (\*) are calculated values based on measurements. The LAI “transmittance” is the result of the transformation of total solar radiation transmittance ( $T_{TSR}$ ) measurement to LAI using the Beer-Lambert relationship detailed below (see Eq (2)).*

| Id     | RDI  | Age | Density<br>( $\text{n} \cdot \text{ha}^{-1}$ ) | G<br>( $\text{m}^2 \cdot \text{ha}^{-1}$ ) | Dg*<br>(cm) | $T_{TSR}$<br>(%) | $LAI_{\text{quercus}}$<br>( $\text{m}^2 \cdot \text{m}^{-2}$ ) |                |         |
|--------|------|-----|------------------------------------------------|--------------------------------------------|-------------|------------------|----------------------------------------------------------------|----------------|---------|
|        |      |     |                                                |                                            |             |                  | Litter traps                                                   | Transmittance* | Needles |
| O12-2  | 0.35 | 76  | 294                                            | 12.8                                       | 23.6        | 23%              | 2.9                                                            | 3.0            | 3.4     |
| O12-3  | 0.59 | 76  | 500                                            | 21.5                                       | 23.4        | 9%               | 3.7                                                            | 4.8            | 3.8     |
| O214-1 | 0.53 | 68  | 604                                            | 19.9                                       | 20.5        | 10%              | 3.7                                                            | 4.5            | 3.9     |
| O214-2 | 0.35 | 68  | 280                                            | 12.8                                       | 24.1        | 23%              | 2.7                                                            | 2.9            | 3.3     |
| O593-1 | 0.60 | 67  | 425                                            | 21.9                                       | 25.6        | 15%              | 3.9                                                            | 3.7            | 4.0     |
| O593-2 | 0.35 | 67  | 192                                            | 12.6                                       | 28.9        | 44%              | 2.8                                                            | 1.6            | 3.6     |

## 203 *Experimental site 4: Barbeau*

204 The Barbeau forest hosts an experimental site of the Integrated Carbon Observation System (ICOS, <https://www.icos->  
 205 [cp.eu](https://www.icos-cp.eu)) (Delpierre et al. 2016). The vegetation is composed of mature oaks of age 135 years and hornbeams (*Carpinus*  
 206 *betulus*) as the understorey. Although there is an understorey, the basal areas and LAI were measured separately for  
 207 each of these species (using litter traps). For this study, only the oak part of the LAI measurements was considered.  
 208 Other LAI measurements were available for this plot, Li-cor LAI-2000 and DHP (Table 3) (Montagnani 2018). Because  
 209 these measures were unable to separate LAIs from different species, the calculations were made using the model  
 210 proposed by Genet et al. (2010) (Eq. (1)).

211 This site was subject to continuous measurement of the LAI using the litter trap method. From 2012 to 2017, the  
 212 measurement consisted of 10 collectors of 0.25 m<sup>2</sup> each, all sorted by species and measured using an LI-3100C Area  
 213 Meter. Since 2017, the measurement consisted of 20 collectors of 0.5m<sup>2</sup> each, and all samples were sorted, dried and  
 214 weighed. Before drying, the contents of the four collectors were measured using an LI-3100C Area Meter. The leaf  
 215 mass area was the defined and applied to the other collector's contents to estimate the collected leaf area. The estimated  
 216 leaf area was then divided by the area covered by all the collectors (10 m<sup>2</sup>) to estimate the stand LAI.

*Table 3: Data from the ICOS site of Barbeau. All values necessary for estimating the LAI using our model, (G, age, Dg) plus additional information (Density), are given in this table. The columns marked with a star (\*) are estimated values. The G values for 2004 and 2005 are estimated backward from 2009 considering the mean growth between 2006 and 2010 (2011 is a thinning year). The LAI<sub>quercus</sub> values of LAI-2000 and DHP are calculated using the model proposed by Genet et al. (2010) (Eq. (1)).*

| Year | G (m <sup>2</sup> ·ha <sup>-1</sup> ) |            |        | Age (years) | Density (n·ha <sup>-1</sup> ) | Dg* (cm) | LAI <sub>quercus</sub> (m <sup>2</sup> ·m <sup>-2</sup> ) |        |      |           |
|------|---------------------------------------|------------|--------|-------------|-------------------------------|----------|-----------------------------------------------------------|--------|------|-----------|
|      | Q. petraea                            | C. betulus | Total* |             |                               |          | Needles                                                   | Litter | DHP* | LAI-2000* |
| 2004 | 20.4                                  | 3.9        | 24.3   | 120         | 212                           | 35.0     | n.d.                                                      | n.d.   | n.d. | 3.1       |
| 2005 | 20.8                                  | 4.0        | 24.7   | 121         | 212                           | 35.3     | n.d.                                                      | n.d.   | n.d. | 3.2       |
| 2009 | 22.3                                  | 4.1        | 26.5   | 125         | 212                           | 36.6     | n.d.                                                      | n.d.   | n.d. | 4.3       |
| 2010 | 22.7                                  | 4.2        | 26.9   | 126         | 212                           | 36.9     | n.d.                                                      | n.d.   | n.d. | 4.0       |
| 2011 | 19.6                                  | 3.2        | 22.8   | 127         | 195                           | 35.8     | n.d.                                                      | n.d.   | n.d. | 2.8       |
| 2012 | 19.9                                  | 3.2        | 23.1   | 128         | 195                           | 36.0     | n.d.                                                      | 3.4    | n.d. | 2.7       |
| 2013 | 20.2                                  | 3.3        | 23.5   | 129         | 195                           | 36.3     | n.d.                                                      | 5.1    | n.d. | 3.5       |
| 2014 | 20.7                                  | 3.4        | 24.1   | 130         | 195                           | 36.8     | n.d.                                                      | 4.6    | n.d. | n.d.      |
| 2015 | 21.1                                  | 3.4        | 24.5   | 131         | 195                           | 37.1     | n.d.                                                      | 4.1    | n.d. | n.d.      |
| 2016 | 21.5                                  | 3.5        | 25.0   | 132         | 195                           | 37.5     | 3.0                                                       | 3.5    | n.d. | n.d.      |
| 2017 | 21.8                                  | 3.6        | 25.4   | 133         | 195                           | 37.7     | n.d.                                                      | 4.1    | n.d. | n.d.      |
| 2018 | 22.2                                  | 3.6        | 25.8   | 134         | 195                           | 38.1     | 3.1                                                       | 3.8    | 3.9  | n.d.      |
| 2019 | 22.4                                  | 3.7        | 26.1   | 135         | 195                           | 38.3     | n.d.                                                      | 3.5    | 3.5  | n.d.      |

## 217 *Published data from other studies*

218 The data from Le Dantec et al. (2000) used the Li-Cor Plant Canopy Analyzer LAI-2000 detector for four consecutive  
219 years (1994-1997) on 17 plots of the Fontainebleau forest (southern Paris region) (Figure 2). Because some of the  
220 measurement plots showed mixed stands, the specific LAI of the main species was estimated using Eq. (1)(Genet et al.  
221 2010).

222 (For details, see Appendix 4.)

223 The data from Balandier et al. (2006) corresponded to the measurements of canopy transmittance of total solar radiation  
224 (TSR) on 30 plots in 5 geographic sites in France (Figure 2). The measurement plots were carefully chosen by the  
225 authors on the basis of the (quasi-) absence of concurrent tree species; sufficiently large surfaces and all interference  
226 from small understorey trees or herbaceous vegetation were avoided by cutting them off. The measurements were  
227 transmittance values, which were converted to LAI using the method described above (see Computation of LAI from  
228 measured transmittance).

229 (For details, see Appendix 5.)

## 230 **Models**

### 231 *LAI estimation model development*

232 The estimation of the LAI was based on the model developed by (Sonohat et al. 2004). They assumed an age-dependent  
233 relationship between LAI and G and age (Eq. (3)):

$$LAI = -b_{max} \cdot \left( \frac{age}{age_{max}} \cdot e^{1 - \frac{age}{age_{max}}} \right)^P \cdot G \quad (3)$$

234  
235 where *LAI* is the estimated LAI, *age* and *G* are the age and basal area, respectively, of the forest stand. The parameters  
236  $b_{max}$  and  $P$  are fitted against the data, and  $age_{max}$ , representing the age at which the LAI is the highest (Balandier et al.  
237 2006), was tested for several values and finally set at 1, for this value gives the best results. This process is detailed in  
238 the results section.

239 Based on this relationship and given the actual LAI/G vs. age relationship observed on our data set, we tested whether a  
240 simpler formulation could allow a fair estimation of LAI with fewer parameters (Eq. (4)) :

$$LAI = -b_{max} \cdot e^{-P \cdot age} \cdot G \quad (4)$$

241

## 242 *Fitting, evaluating and improving the model*

243 All versions of the models were fitted using the nonlinear least squares (NLS) R function, which determines the  
244 estimates of the parameters of a non-linear model (the function to minimize is given in Eq. (5)). The evaluation of the  
245 model was performed using the “leave-one-out cross-validation” (LOOCV) algorithm in R. The metrics used to  
246 evaluate the models were the root mean square error (RMSE), the bias, the modelling efficiency (ME) (Nash and  
247 Sutcliffe 1970) and the Akaike information criterion (AIC) (Akaike 1973)

$$J(a, b, c) = \sum (LAI_{est}(a, b, c) - LAI_{mes})^2 \quad (5)$$

248

## 249 **Results**

### 250 **Performance of the needle method**

251 The uncertainty of the global measurement of LAI using the needle method decreased rapidly with the first hundred  
252 measures. Fifty-two throws were necessary to estimate the LAI with an uncertainty of 0.5 LAI units. To halve this  
253 uncertainty, 148 more throws were required to reach 200, and more than 300 throws were required to halve it again. All  
254 details of needle measurements is given in Appendix 2.

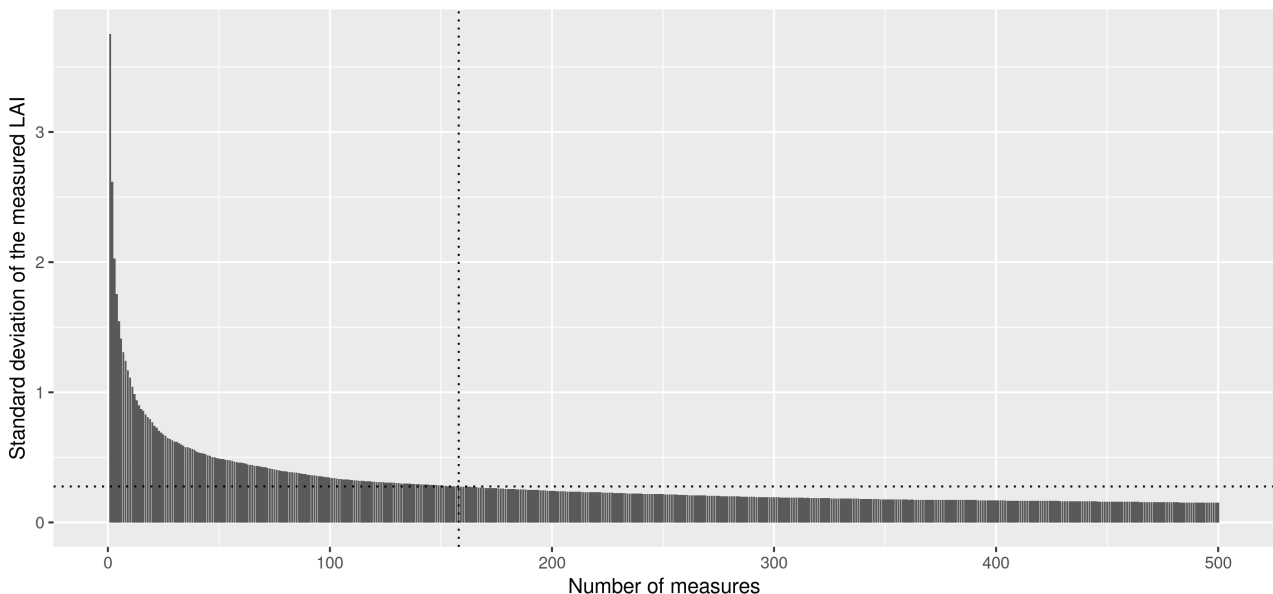

Figure 3: Evolution of the uncertainty of the measure given the number of throws made on the plot. The dotted lines mark the number of measures to achieve to obtain a twice as much precision.

## 256 **Assessment of the LAI-G-age relationship**

257 Equation (6) represents the expression of the age-dependent term. It was chosen by Sonohat et al. (2004) to reflect an  
258 age at which the LAI is maximized ( $age_{max}$ ):

$$\frac{LAI}{G} = b(age) = -b_{max} \cdot \left( \frac{age}{age_{max}} \cdot e^{1 - \frac{age}{age_{max}}} \right)^P \quad (6)$$

259 The performance of the best fits given different values of  $age_{max}$  showed that 1 is the optimal value of this parameter.

260 Since  $age_{max}=1$  and  $P(age_{max} = 1) = 0.004$  gives the best fit (Figure 4.a, Appendix 6), Eq. (6) can be simplified as a  
261 decreasing exponential (Eq. (7)) without significant loss of fit (Figure 4.b, Table 4), as follows:

$$\frac{LAI}{G} = b(age) = -b_{max} \cdot e^{-P \cdot age} \quad (7)$$

262

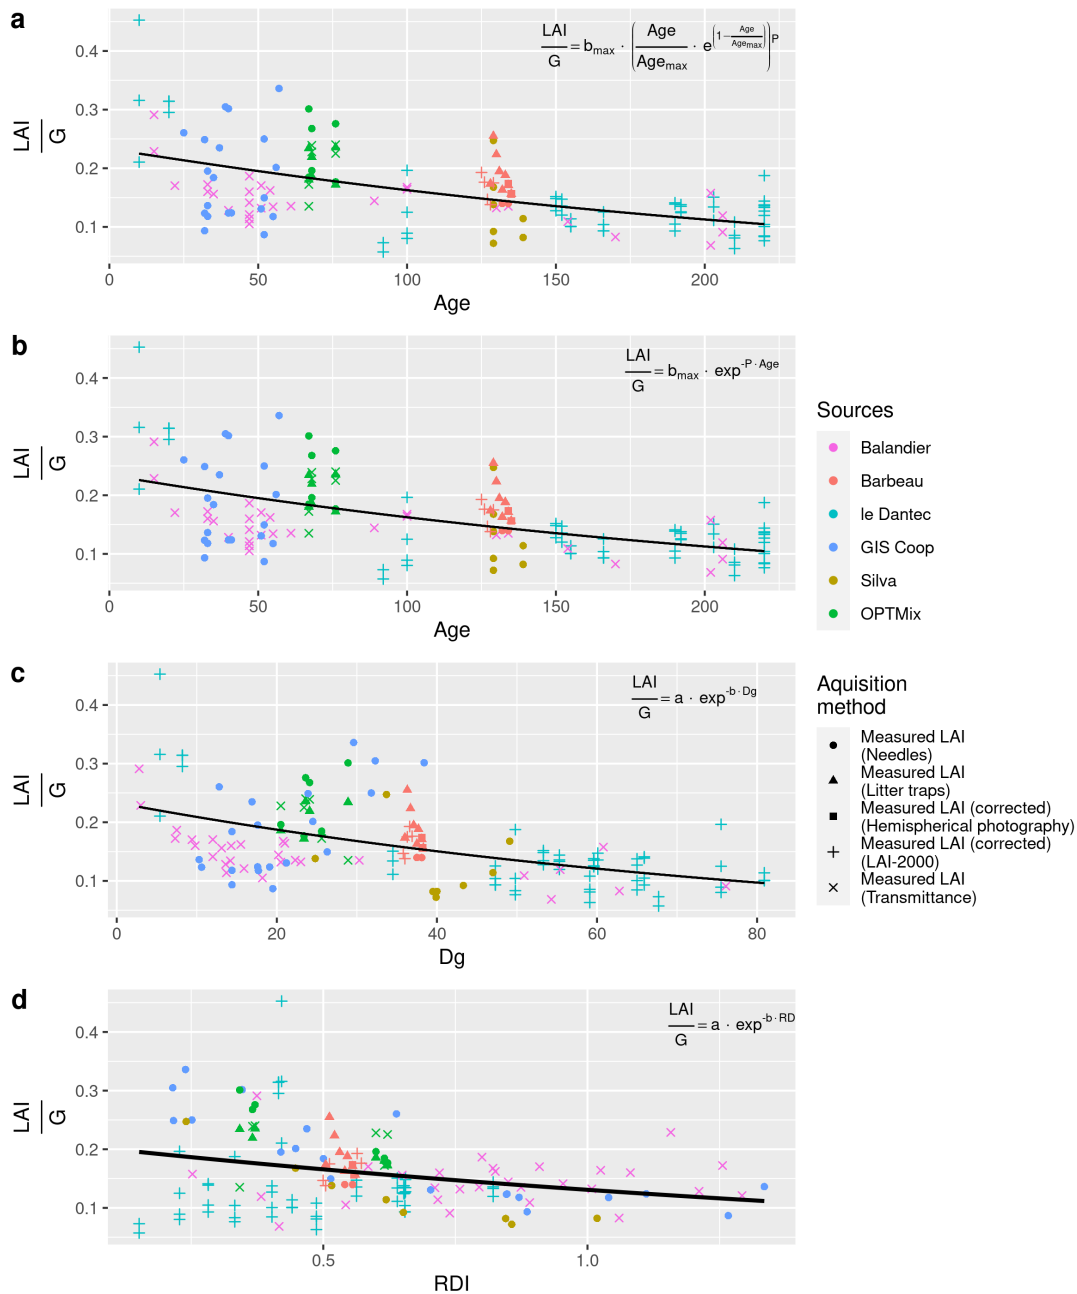

Figure 4: Stand age-(a, b), Dg- (c) and RDI-dependent (d) terms against stand age, Dg and RDI, respectively. The relationship fitted on these figures is displayed in the top-right corner of each panel. The performances are summarized in Table 4. The colours represents the experimental networks and the shapes of the points represents the method used to measure the LAI. Note: the “measured LAI (transmittance)” is the measurement of the transmittance value transformed in LAI value (Eq. (2)) and the DHP and LAI-2000 measured LAI are corrected to the oak-only LAI using the Genet et al. (2010) model (Eq. (1)).

263 Replacing the age by the Dg in Eq. (7) did provide a good fit (Table 4 and Figure 4c) but the fit was not as good as the  
 264 age-dependent relationship. However, even if the relationship between b and Dg appears less parsimonious (higher AIC  
 265 values, lower R<sup>2</sup>, Table 4), Dg may nevertheless be used accurately when age is not available. The RDI-dependent term  
 266 showed little to no signal when considering the whole dataset (Table 4 and Figure 4d). Note that the Balandier and Le  
 267 Dantec data seemed to increase with respect to the RDI, while the GIS Coop, Silva and OPTMix data are decreased.

Table 4: Statistics of the relationships between LAI:G and age on Dg.

| Relationship                                                                                         | RMSE | Bias | AIC  | R <sup>2</sup> |
|------------------------------------------------------------------------------------------------------|------|------|------|----------------|
| $b(age) = -b_{max} \cdot \left( \frac{age}{age_{max}} \cdot e^{1 - \frac{age}{age_{max}}} \right)^P$ | 0.05 | 0.00 | -437 | 0.32           |
| $b(age) = -b_{max} \cdot e^{-P \cdot age}$                                                           | 0.05 | 0.00 | -438 | 0.32           |
| $b(Dg) = -a \cdot e^{-b \cdot Dg}$                                                                   | 0.05 | 0.00 | -430 | 0.28           |
| $b(RDI) = -a \cdot e^{-b \cdot RDI}$                                                                 | 0.06 | 0.00 | -383 | 0.08           |

## 268 Assessment and improvement of the model

269 The estimates of the LAI using the model presented in Eq. (4) are presented in Figure 5. The RMSE was approximately  
 270 0.9 points with a nonnull bias of -0.17.

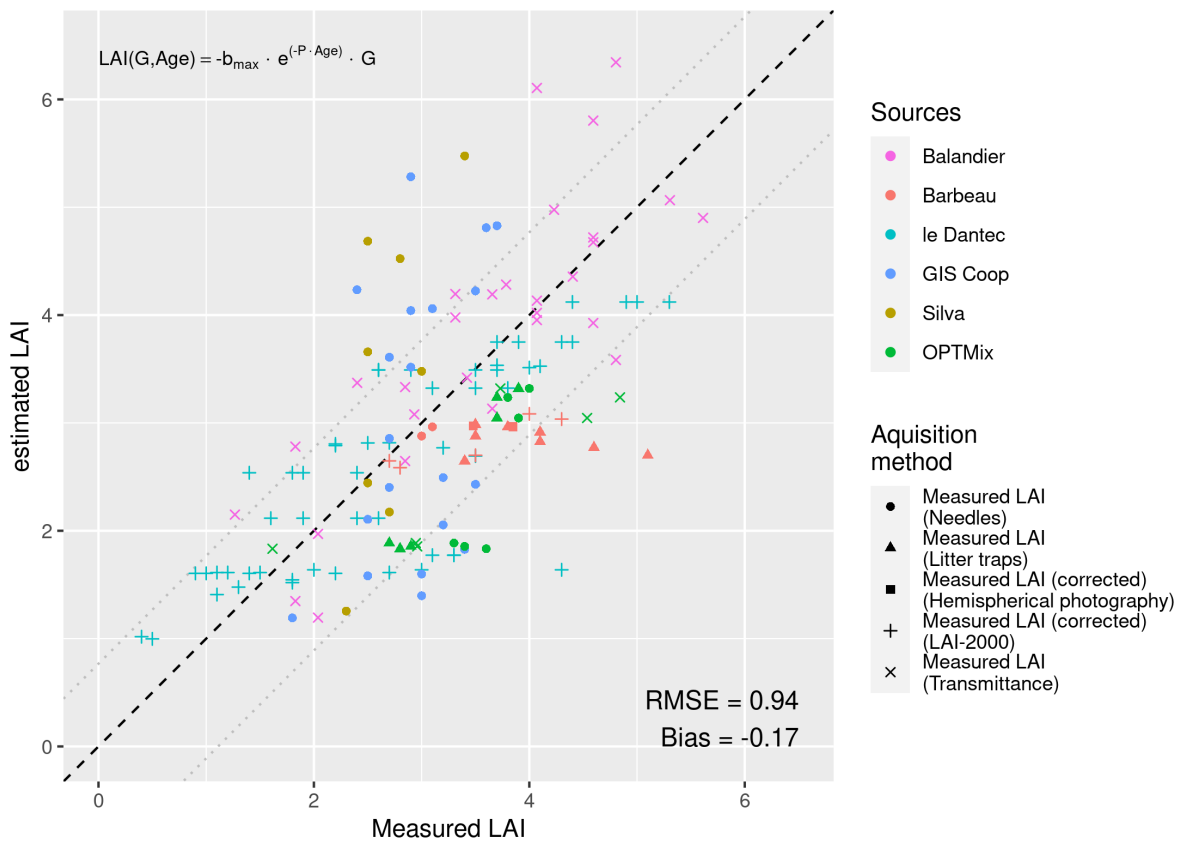

Figure 5: Measured values against estimated ones using the simplified version of the Sonohat et al. (2004) -inspired model (Eq. (4)). The dashed line represent the 1: 1 relation between measured and estimated values and the dotted lines represents the upper (=Bias+RMSE) and lower (=bias-RMSE) values of the confidence range.

271 The addition of a constant term (Eq. (8)) reduced the RMSE by approximately 14% with a null bias (Figure 6):

$$LAI(G, age) = -b_{max} \cdot e^{-P \cdot age} \cdot G + cste \quad (8)$$

272



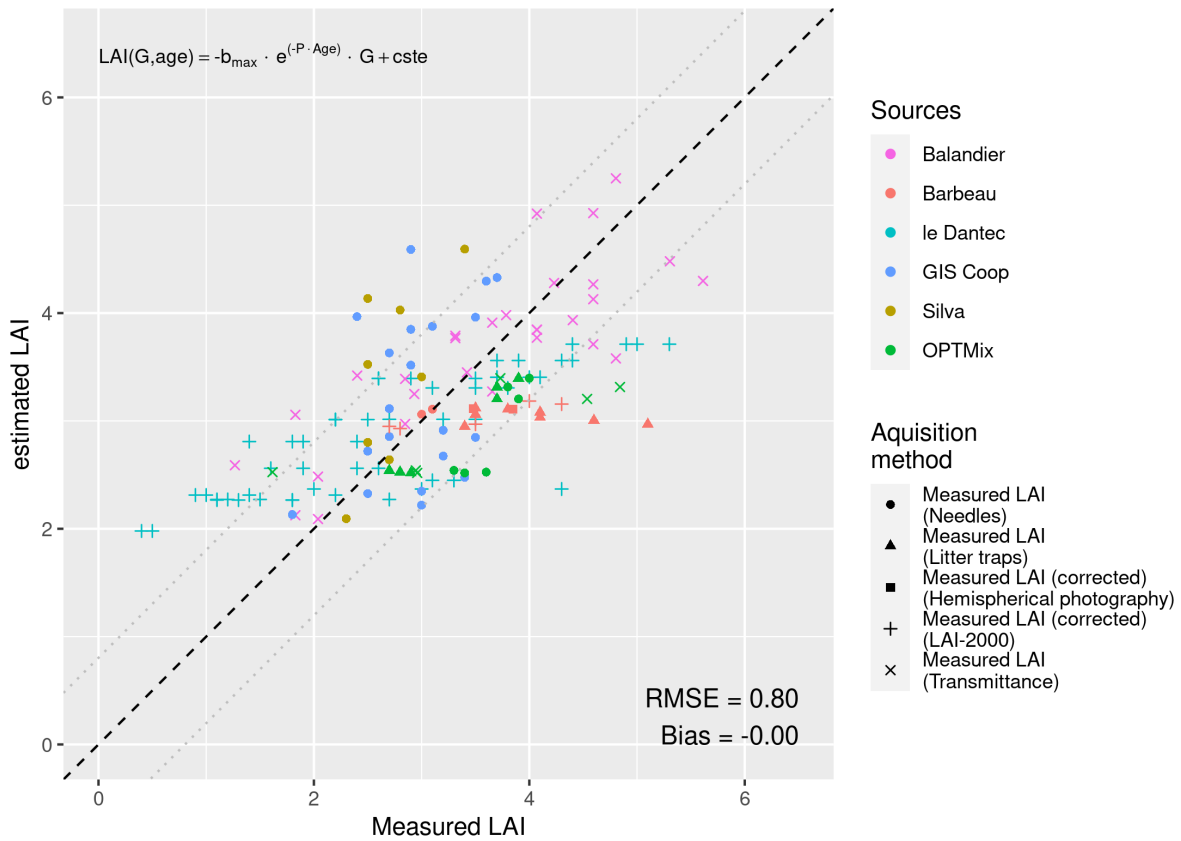

Figure 6: Measured values against estimated ones using the precedent model with addition of a constant term as in equation (8). The dashed line represent the 1: 1 relationship between measured and estimated values and the dotted lines represents the upper (Bias+RMSE) and lower (bias -RMSE) values of the confidence range.

273 Replacing the age by  $Dg$  (Eq. (9)) gave similar results with an RMSE of 0.77 and a null bias (Figure 7):

$$LAI = -a \cdot e^{-b \cdot Dg} \cdot G + cste \quad (9)$$

274

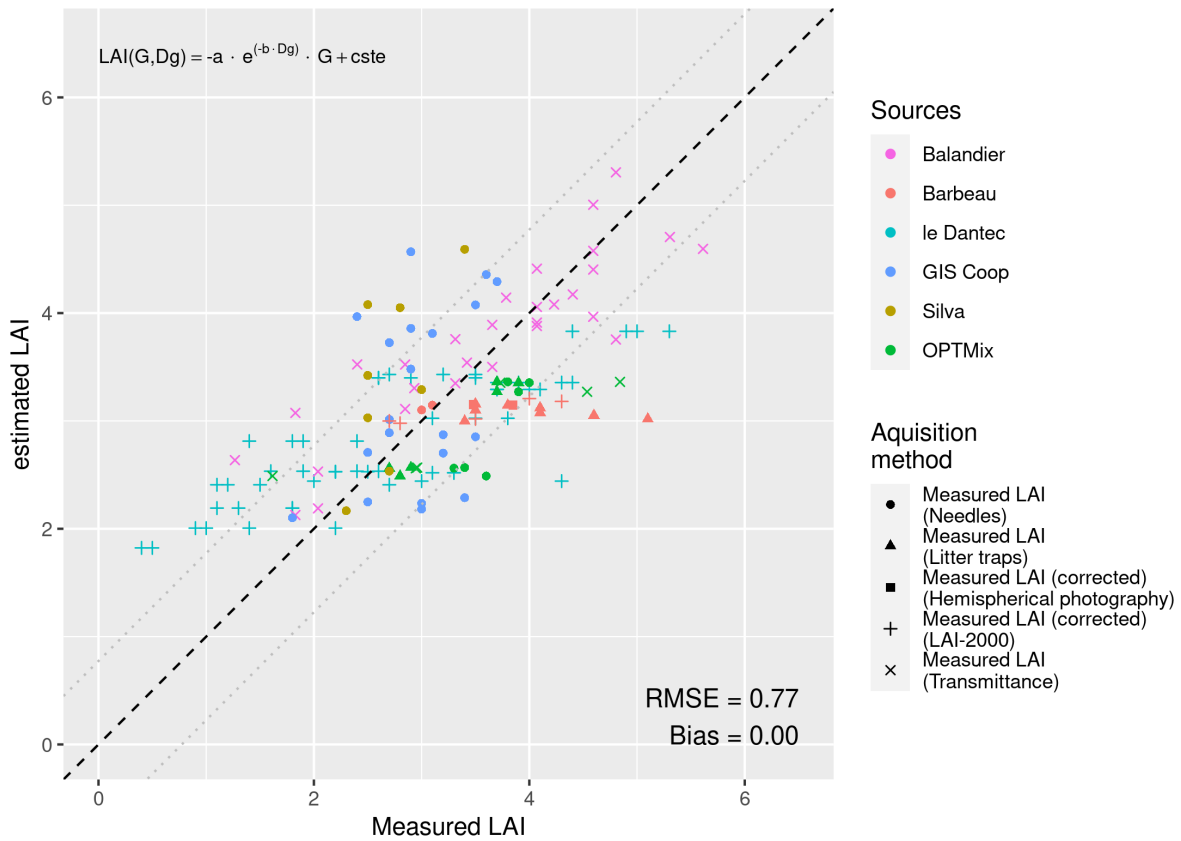

Figure 7: Measured values against estimated ones using the model proposed in Eq. 9. The age-dependent term has been replaced by a Dg-dependant term. The dashed line represent the 1: 1 relationship between measured and estimated values and the dotted lines represents the upper (Bias+RMSE) and lower (bias -RMSE) values of the confidence range.

275 Note that the distribution of residuals of the model (Eq. (8)) along the Dg range showed a significant linear regression,  
 276 with a confidence level of 0.95 (Figure 8). The relationship between the residuals and Dg could be included in Eq. (8) to  
 277 form Eq. (10):

$$LAI = -b_{max} \cdot e^{-P \cdot age} \cdot G + \alpha \cdot Dg + \beta \quad (10)$$

278

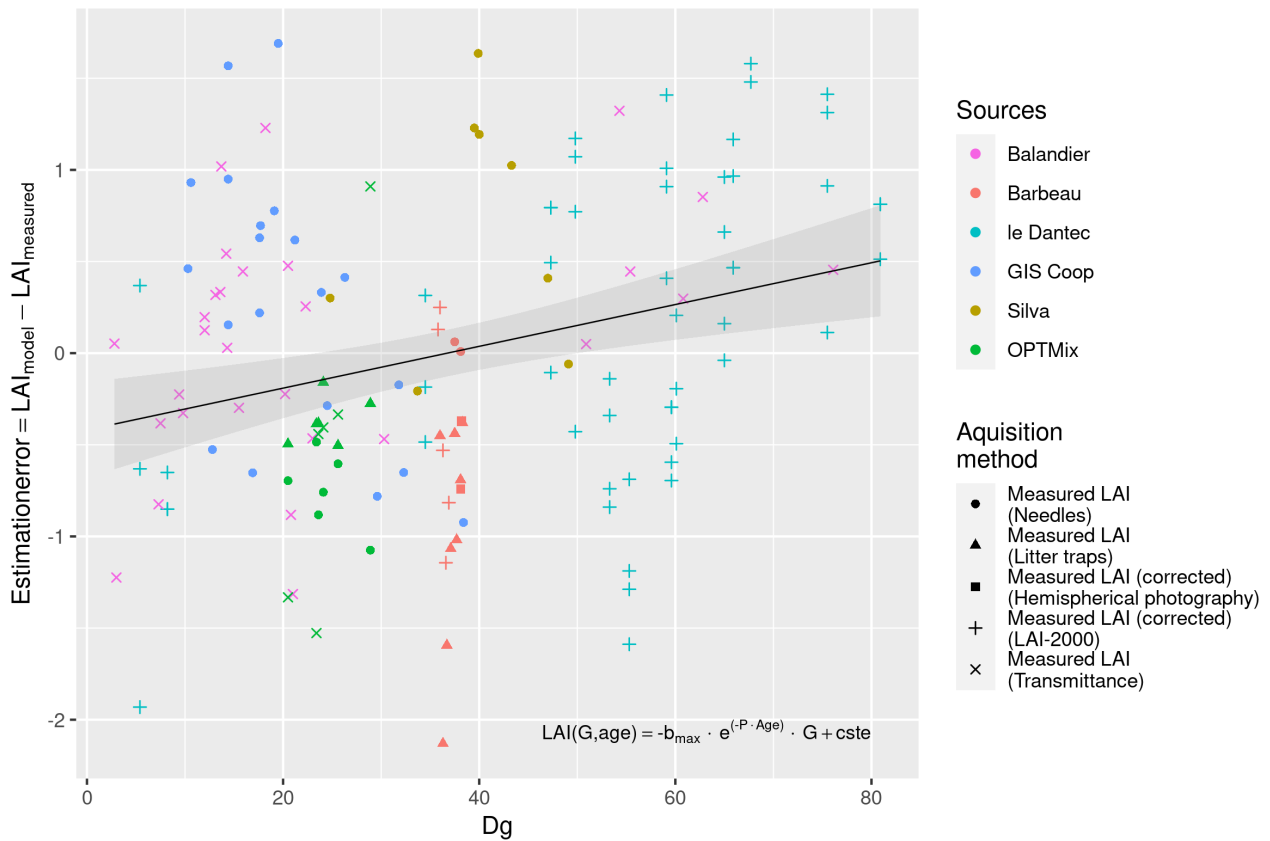

Figure 8: Residuals of the simplified model (Eq. (8)) with constant term against the  $D_g$  value. The solid line represents the least-square linear regression and the grey area represents the confidence interval (0.95)

280 Finally, the  $D_g$ -dependent correction factor included in Eq. (10) improved the RMSE by ~10%. This model fixed the  
 281 large misestimation of the low-LAI plots measured by Le Dantec et al. (2000)(Figure 9).  
 282 Generally, the use of a constant term was able to cancel the bias in the model.

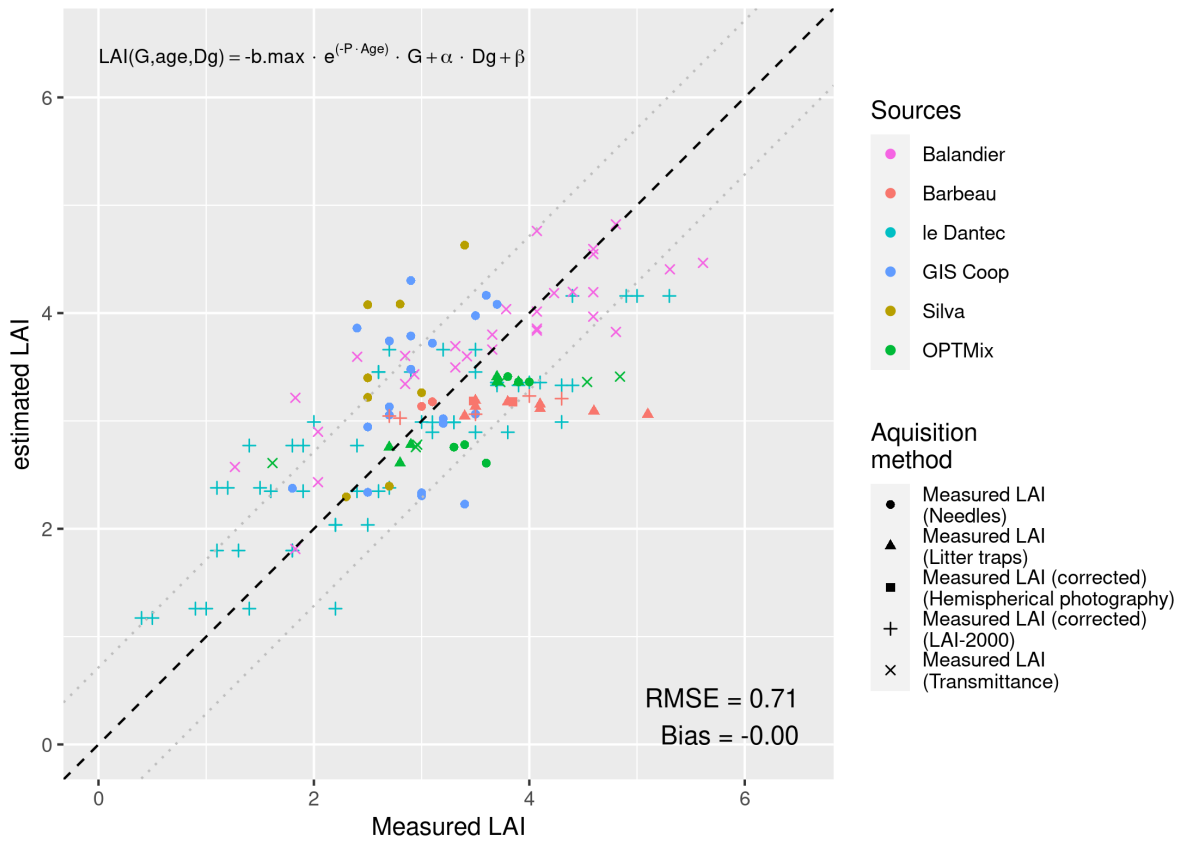

| Model                                                                          | RMSE    |      | Bias    |       | ME      |      | AIC     |     |
|--------------------------------------------------------------------------------|---------|------|---------|-------|---------|------|---------|-----|
|                                                                                | X-valid | Fit  | X-valid | Fit   | X-valid | Fit  | X-valid | Fit |
| $LAI = -b_{max} \cdot e^{-P \cdot age} \cdot G$ (4)                            | 0.93    | 0.91 | -0.15   | -0.15 | 0.22    | 0.24 | 388     | 391 |
| $LAI = -b_{max} \cdot e^{-P \cdot age} \cdot G + cste$ (8)                     | 0.82    | 0.80 | 0.00    | 0.00  | 0.39    | 0.42 | 352     | 354 |
| $LAI = -a \cdot e^{-b \cdot Dg} \cdot G + cste$ (9)                            | 0.79    | 0.77 | 0.00    | 0.00  | 0.44    | 0.46 | 342     | 344 |
| $LAI = -b_{max} \cdot e^{-P \cdot age} \cdot G + \alpha \cdot Dg + \beta$ (10) | 0.73    | 0.71 | 0.00    | 0.00  | 0.51    | 0.54 | 321     | 323 |

283

## 284 LAI measurement methods comparison

285 The Fontainebleau-Barbeau site has been measured regularly for 10 consecutive years, giving a time series of the  
 286 evolution of  $G$  and  $Dg$  (Figure 8). The variables used for our model ( $G$  and  $Dg$ ) did not exhibit the same temporal  
 287 variations as the measured LAI (in red) (The coefficients of variation for  $G$ ,  $Dg$  and measured LAI were 5%, 2% and

288 19%, respectively). Therefore, the estimated LAI using our model (black stars, cv = 2%) could not reproduce the  
 289 temporal variations in the measured LAI.

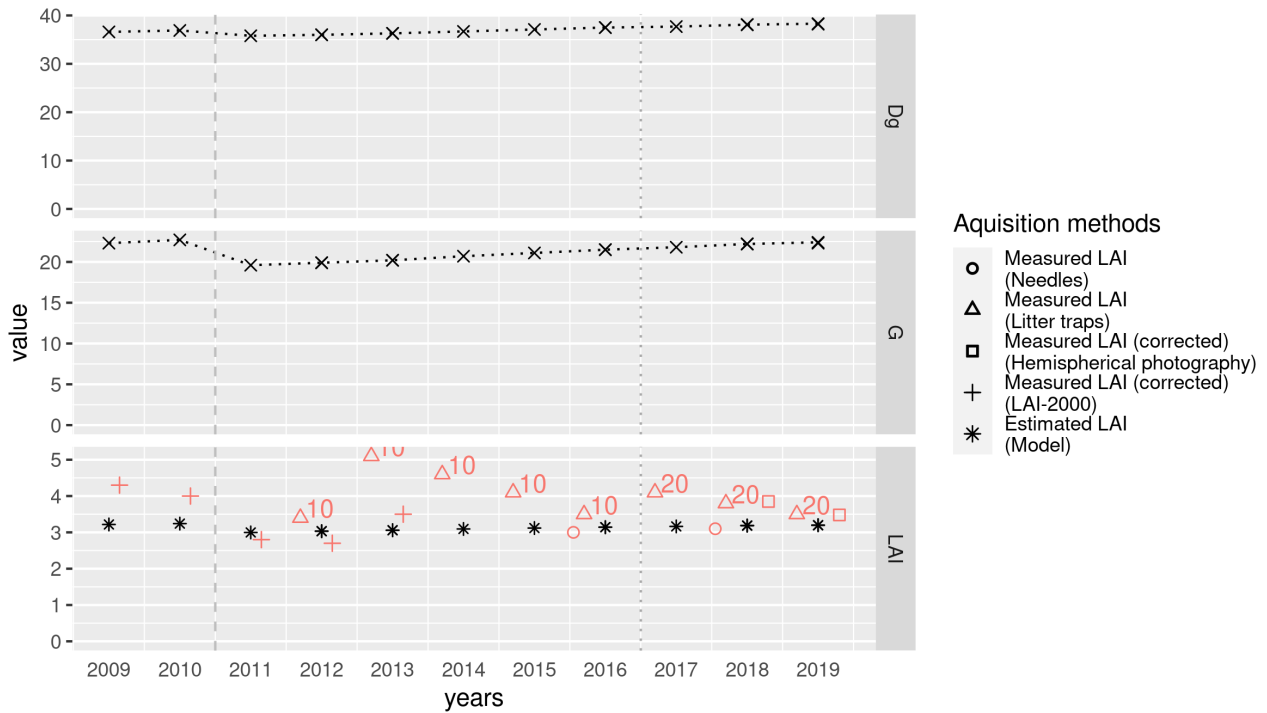

Figure 10: Evolution of the maximum LAI measured on the Barbeau site by different methods (red hollow shapes) against the  $D_g$  (top) and  $G$  (middle) measured values. The LAI (bottom) estimation based on the  $G$ , age and  $D_g$  measurement are shown as black stars (\*) and are estimated using the model described by Eq. (10). Note the fall of  $G$  and measured LAI between the years 2010 and 2011, following a commercial thinning (vertical dashed light-grey line). Also, the litter collection protocol changed slightly (addition of litter traps) during the year 2017.

291 Overall, note that different measurement methods provided different LAI values except for the DHP that matched the  
292 litter trap values for 2018 and 2019 at the Barbeau site. Moreover, the mean LAI over the 2009-2019 period in Barbeau,  
293 considering all available measures, was 3.7 (sd = 0.6), while the mean LAI estimation was 3.1 (sd = 0.1). Thus, no  
294 significant difference between measures and estimations could be noted under the condition that all measurement  
295 methods have the same confidence level.

296 Figure 11 shows the LAI values measured by different methods in addition to the estimation made by our model  
297 described by Eq. (10). When comparing the results obtained by both the litter trap and the LAI-2000 methods,  
298 considering the litter trap method as the reference, LAI-2000 tended to underestimate the LAI.

299 At the OPTMix site, litter trap and needle measurements showed concordant measurements in the high-RDI plots  
300 (O12.3, O214.1, O593.1) but diverge in the low RDI plots (O12.2, O214.2, O593.2). Generally, the different  
301 measurement methods showed a high degree of variation in their results.

302 Additionally, our model seemed to underestimate the LAI at both sites (Barbeau and OPTMix) compared to the  
303 different measurements (Figure 11).

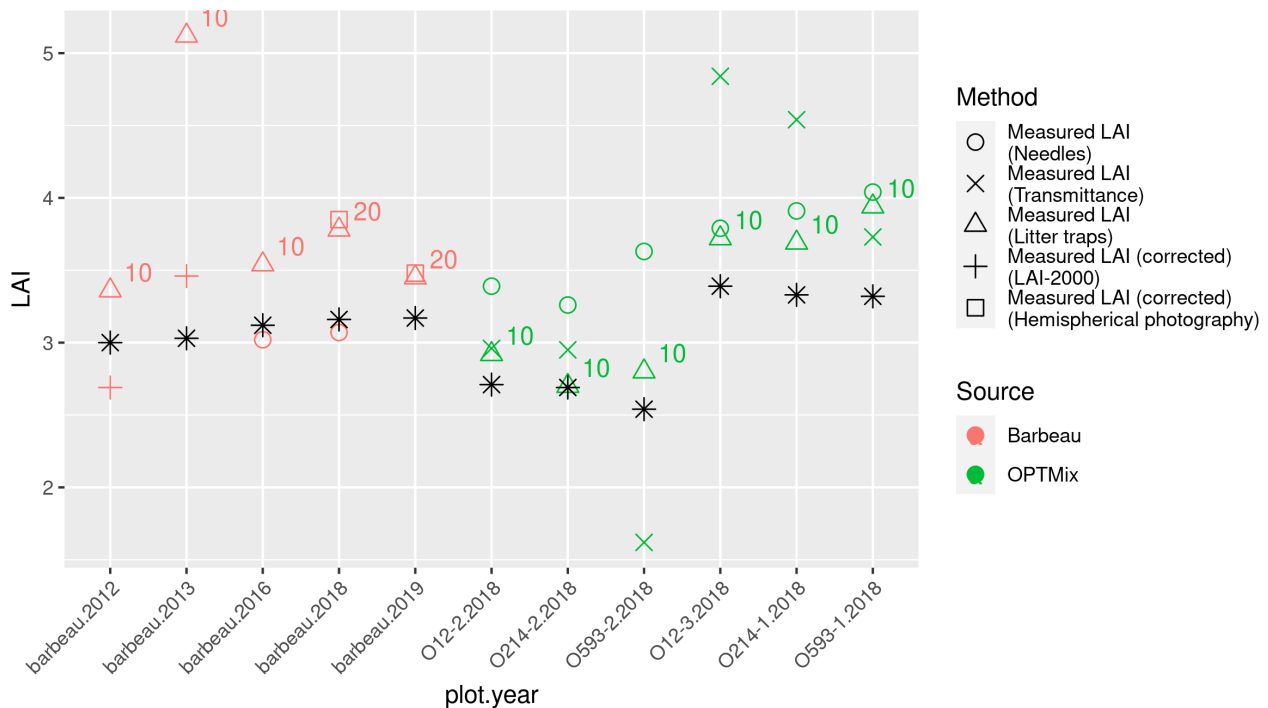

Figure 11: LAI values of Barbeau (one plot, five years) and OPTMix (6 plots, one year) sites using different measurement methods. The shapes represents the methods and the color the site. The black stars (\*) are the LAI values estimated using the model described by the equation (2). Barbeau years presented are only those for which two measures are available to allow comparison between measures as well as between measures and estimation. OPTMix plots are arranged by density with low density first (O12-2, O214-2 and O593-2) and normal density last (O12-3, O214-1 and O593-1).

## 304 Discussion

305 Based on field and literature data, we proposed an empirical model to estimate the LAI for even-aged oak stands. While  
 306 there might be a better choice of independent variables (e.g., sapwood area, previous year meteorology) to predict the  
 307 LAI with greater precision, we chose to propose a method based on widely available and easily obtainable stand  
 308 variables. This approach allowed the estimation of the stand LAI with fair precision (Table 5). All of the experimental  
 309 plots measured were even-aged sessile oak stands located in the northern half of France (Figure 2), and since our data  
 310 span a large range of ages, pedoclimatic conditions and LAI values, nothing seems to forbid the use of this model on a  
 311 broader area.

312 We assumed a relationship between the LAI and the G, Dg and age at the stand level (Jonckheere et al. 2004). Based on  
 313 this hypothesis, we used the formula developed by Sonohat et al. (2004) on coniferous stands and further used on pure  
 314 oak stands by Balandier et al. (2006), and we calibrated it to obtain the LAI of pure oak stands. After simplifying it  
 315 without degrading its predictions, we added a linearly Dg-dependent term and a constant term. In doing so, we managed  
 316 to cancel its bias and reduce the mean error of its predictions (Table 5).

317 In forest growth modelling, different methods are used to estimate the LAI. One way to do so is to use net primary  
318 production and allow some amount of assimilated carbon to the leaves. The mass of carbon allocated to the canopy is  
319 then transformed into leaf dry mass and then leaf area (Running and Gower 1991; Pietsch et al. 2005). Another way is  
320 to use the previous year's LAI and apply a modifier to modulate it given the climatic conditions (condensed in a  
321 climatic index relating the soil water stress) (Guillemot et al. 2017). With our method, we proposed estimating a base  
322 value of the LAI using a frequently measured stand characteristic. This value could then be adjusted given the  
323 environmental conditions.

324 The Barbeau site measurements showed an interannual variation (measured by both the LAI-2000 from 2009 to 2013  
325 and the litter traps from 2012 to 2019) that was uncorrelated with the evolution of the stand characteristics (Figure 10).  
326 By design, this variation enabled the estimation of the mean value of the LAI by averaging the interannual variability of  
327 this trait caused by stresses and environmental conditions. If this estimation is made in the context of a process-based  
328 model simulation, some modifier should be considered to take into account the perturbation that could happen on such a  
329 stand.

330 The needle method, upon which the majority of our original data are based, allows measurement with a fair precision  
331 ( $< 0.5$  LAI unit, see Figure 3) of the LAI of a spot at the stand scale. The time needed for two people to collect enough  
332 data (about 130 local LAI measurements, see Figure 3) to measure the LAI of one spot is approximately 2 hours of  
333 field work. Given the simplicity and genericity of the needed hardware, the needle method is a good method for  
334 occasionally measuring the LAI. However, some limitations include the possibility of overestimation by the counting  
335 previous year's leaves as the present year's leaves in the case of slowly degrading litter and the assumption that the  
336 leaves fall homogeneously and exclusively on the stand's ground. Although the first limitation can be resolved by  
337 studying the litter to find the elements allowing distinction between old and new leaves, the second limitation can  
338 hardly be resolved other than by defining transects that allow the representation of the heterogeneity of the stand.

339 Different measurement methods produce different LAI values (Figure 11) for the same plot and year. As the true value  
340 of the LAI is unknown and because each measurement method has flaws, it is difficult to assess the LAI measurement  
341 methods (Parker 2020). Each is subject to constraints such as a critical sample size (due to the heterogeneity of  
342 measurements in the case of litter traps or transmittance measurement) (Bréda 2003; Jonckheere et al. 2004), the time  
343 required to process the samples (litter traps) or the hypotheses of spatial and angular distributions of the leaves in the  
344 canopy (transmittance measurements, hemispherical photography or LAI-2000) (Weiss et al. 2004).

345 The comparison between litter traps and LAI-2000 measurements shows the same trend as exposed by Bréda (2003).  
346 However, the scarcity of data confirming the underestimation by this method implies caution in this statement.



347 The use of Dg, G and age prevent the model from predicting interannual variations. There may be many causes of  
348 variation, such as pest outbreaks, fire, management thinning operations or climate-related stress (e.g., high heat, late  
349 frost, long drought) (Hogg 1999; Le Dantec et al. 2000; Barr et al. 2004). Additionally, a change in the sampling  
350 method, which occurred at the Barbeau site in 2017 (Figure 10), can impact the LAI measurement. That said, the exact  
351 nature of the causes of variation is not known, nor is the amplitude each variations would causes. Thus, the model  
352 cannot anticipate it given the data used to make predictions.

353 The present work shows the use of an important set of data using age, density and diameter of trees to predict the LAI  
354 of a stand with good precision. Even if the interannual variations for a single stand over a ten-year course are important,  
355 the majority of the predictions are close to the measured values (Table 5).

## 356 **Acknowledgements**

357 This work was conducted in the context of a doctoral thesis funded by the French National Forest Office (ONF).

358 This work benefited from the French state aid managed by the ANR under the "Investissements d'avenir" programme  
359 with the reference ANR-16-CONV-0003

360 The OPTMix experimental site where part of our study took place was installed and equipped by the Centre Val-de-  
361 Loire region, the Loiret and the French National Forest Office.

362 The sites belongs to the French national research infrastructure, ANAEE-F (<http://www.anaee-france.fr/fr/>), and is  
363 included in the SOERE TEMPO (<https://tempo.pheno.fr/>). The sites are also in the framework of the ZAL (LTSER  
364 Zone Atelier Loire) and the GIS Coop network ([https://www6.inra.fr/GIS\\_Coop/](https://www6.inra.fr/GIS_Coop/)), which is supported by the French  
365 Ministry for Agriculture and Food.

## 366 References

- Akaike H (1973) Maximum likelihood identification of Gaussian autoregressive moving average models. *Biometrika* 60:255–265
- Asner GP, Scurlock JMO, Hicke JA (2003) Global synthesis of leaf area index observations: implications for ecological and remote sensing studies. *Global Ecology and Biogeography* 12:191–205. <https://doi.org/10.1046/j.1466-822X.2003.00026.x>
- Balandier P, Sonohat G, Sinoquet H, et al (2006) Characterisation, prediction and relationships between different wavebands of solar radiation transmitted in the understorey of even-aged oak (*Quercus petraea*, *Q. robur*) stands. *Trees* 20:363–370. <https://doi.org/10.1007/s00468-006-0049-3>
- Barr AG, Black TA, Hogg EH, et al (2004) Inter-annual variability in the leaf area index of a boreal aspen-hazelnut forest in relation to net ecosystem production. *Agricultural and Forest Meteorology* 126:237–255. <https://doi.org/10.1016/j.agrformet.2004.06.011>
- Bartelink H (1997) Allometric relationships for biomass and leaf area of beech (*Fagus sylvatica* L). *Annales des Sciences Forestières* 54:39–50. <https://doi.org/10.1051/forest:19970104>
- Black TA, Kelliher FM, Wallace JS, et al (1989) Processes controlling understorey evapotranspiration. *Philosophical Transactions of the Royal Society of London B, Biological Sciences* 324:207–231. <https://doi.org/10.1098/rstb.1989.0045>
- Bréda N, Granier A (1996) Intra- and interannual variations of transpiration, leaf area index and radial growth of a sessile oak stand (*Quercus petraea*). *Ann For Sci* 53:521–536. <https://doi.org/10.1051/forest:19960232>
- Bréda N, Soudani K, Bergonzini J-C (2002) *Mesure de l'indice foliaire en forêt*. GIP ECOFOR, Paris
- Bréda NJJ (2003) Ground-based measurements of leaf area index: a review of methods, instruments and current controversies. *J Exp Bot* 54:2403–2417. <https://doi.org/10.1093/jxb/erg263>
- Bussotti F, Pollastrini M, Holland V, Brüggemann W (2015) Functional traits and adaptive capacity of European forests to climate change. *Environmental and Experimental Botany* 111:91–113. <https://doi.org/10.1016/j.envexpbot.2014.11.006>
- Cannell MGR, Grace J (2011) Competition for light: detection, measurement, and quantification. *Canadian Journal of Forest Research*. <https://doi.org/10.1139/x93-248>
- Casa R, Upreti D, Pelosi F (2019) Measurement and estimation of leaf area index (LAI) using commercial instruments and smartphone-based systems. *IOP Conference Series: Earth and Environmental Science* 275:012006. <https://doi.org/10.1088/1755-1315/275/1/012006>
- Chen JM, Black TA (1992) Defining leaf area index for non-flat leaves. *Plant, Cell & Environment* 15:421–429
- Chen JM, Cihlar J (1995) Plant canopy gap-size analysis theory for improving optical measurements of leaf-area index. *Appl Opt*, AO 34:6211–6222. <https://doi.org/10.1364/AO.34.006211>

- Clark DB, Olivas PC, Oberbauer SF, et al (2008) First direct landscape-scale measurement of tropical rain forest Leaf Area Index, a key driver of global primary productivity. *Ecology Letters* 11:163–172. <https://doi.org/10.1111/j.1461-0248.2007.01134.x>
- Cutini A, Matteucci G, Mugnozza GS (1998) Estimation of leaf area index with the Li-Cor LAI 2000 in deciduous forests. *Forest Ecology and Management* 105:55–65. [https://doi.org/10.1016/S0378-1127\(97\)00269-7](https://doi.org/10.1016/S0378-1127(97)00269-7)
- Delpierre N, Berveiller D, Granda E, Dufrêne E (2016) Wood phenology, not carbon input, controls the interannual variability of wood growth in a temperate oak forest. *New Phytologist* 210:459–470. <https://doi.org/10.1111/nph.13771>
- Dufrêne E, Bréda N (1995) Estimation of deciduous forest leaf area index using direct and indirect methods. *Oecologia* 104:156–162. <https://doi.org/10.1007/BF00328580>
- Dufrêne E, Davi H, François C, et al (2005) Modelling carbon and water cycles in a beech forest: Part I: Model description and uncertainty analysis on modelled NEE. *Ecological Modelling* 185:407–436. <https://doi.org/10.1016/j.ecolmodel.2005.01.004>
- Duplat P, Tran-Ha M (1997) Modélisation de la croissance en hauteur dominante du chêne sessile (*Quercus petraea* Liebl) en France Variabilité inter-régionale et effet de la période récente (1959-1993). *Ann For Sci* 54:611–634. <https://doi.org/10.1051/forest:19970703>
- Eriksson H, Eklundh L, Hall K, Lindroth A (2005) Estimating LAI in deciduous forest stands. *Agricultural and Forest Meteorology* 129:27–37. <https://doi.org/10.1016/j.agrformet.2004.12.003>
- Fassnacht KS, Gower ST (1997) Interrelationships among the edaphic and stand characteristics, leaf area index, and aboveground net primary production of upland forest ecosystems in north central Wisconsin. 27:10
- Genet H, Bréda N, Dufrêne E (2010) Age-related variation in carbon allocation at tree and stand scales in beech (*Fagus sylvatica* L.) and sessile oak (*Quercus petraea* (Matt.) Liebl.) using a chronosequence approach. *Tree Physiol* 30:177–192. <https://doi.org/10.1093/treephys/tpp105>
- Gower ST, Pongracic S, Landsberg JJ (1996) A global trend in belowground carbon allocation: can we use the relationship at smaller scales? *Ecology* 77:1750–1755
- Granier A, Bréda N, Biron P, Villette S (1999) A lumped water balance model to evaluate duration and intensity of drought constraints in forest stands. *Ecological Modelling* 116:269–283. [https://doi.org/10.1016/S0304-3800\(98\)00205-1](https://doi.org/10.1016/S0304-3800(98)00205-1)
- Guillemot J, Francois C, Hmimina G, et al (2017) Environmental control of carbon allocation matters for modelling forest growth. *New Phytologist* 214:180–193. <https://doi.org/10.1111/nph.14320>
- Hanewinkel M, Cullmann DA, Schelhaas M-J, et al (2013) Climate change may cause severe loss in the economic value of European forest land. *Nature Climate Change* 3:203–207. <https://doi.org/10.1038/nclimate1687>

- Hogg EH (1999) Simulation of interannual responses of trembling aspen stands to climatic variation and insect defoliation in western Canada. *Ecological Modelling* 114:175–193. [https://doi.org/10.1016/S0304-3800\(98\)00150-1](https://doi.org/10.1016/S0304-3800(98)00150-1)
- Hurlbert M, Krishnaswamy J, Johnson FX, et al (2019) Risk management and decision making in relation to sustainable development
- Jokela EJ, Dougherty PM, Martin TA (2004) Production dynamics of intensively managed loblolly pine stands in the southern United States: a synthesis of seven long-term experiments. *Forest Ecology and Management* 192:117–130. <https://doi.org/10.1016/j.foreco.2004.01.007>
- Jonckheere I, Fleck S, Nackaerts K, et al (2004) Review of methods for in situ leaf area index determination. *Agricultural and Forest Meteorology* 121:19–35. <https://doi.org/10.1016/j.agrformet.2003.08.027>
- Korboulewsky N, Pérot T, Balandier P, et al (2015) OPTMix - Dispositif expérimental de suivi à long terme du fonctionnement de la forêt mélangée. 12
- Landsberg JJ, Waring RH (1997) A generalised model of forest productivity using simplified concepts of radiation-use efficiency, carbon balance and partitioning. *Forest Ecology and Management* 95:209–228. [https://doi.org/10.1016/S0378-1127\(97\)00026-1](https://doi.org/10.1016/S0378-1127(97)00026-1)
- Le Dantec V, Dufrêne E, Saugier B (2000) Interannual and spatial variation in maximum leaf area index of temperate deciduous stands. *Forest Ecology and Management* 134:71–81. [https://doi.org/10.1016/S0378-1127\(99\)00246-7](https://doi.org/10.1016/S0378-1127(99)00246-7)
- Le Goff N, Ottorini J-M, Ningre F (2011) Evaluation and comparison of size–density relationships for pure even-aged stands of ash (*Fraxinus excelsior* L.), beech (*Fagus sylvatica* L.), oak (*Quercus petraea* Liebl.), and sycamore maple (*Acer pseudoplatanus* L.). *Annals of Forest Science* 68:461–475. <https://doi.org/10.1007/s13595-011-0052-8>
- Le Moguédec G, Dhôte J-F (2012) Fagacées: a tree-centered growth and yield model for sessile oak (*Quercus petraea* L.) and common beech (*Fagus sylvatica* L.). *Annals of Forest Science* 69:257–269. <https://doi.org/10.1007/s13595-011-0157-0>
- Lindner M, Maroschek M, Netherer S, et al (2010) Climate change impacts, adaptive capacity, and vulnerability of European forest ecosystems. *Forest Ecology and Management* 259:698–709. <https://doi.org/10.1016/j.foreco.2009.09.023>
- Monserud RA (2003) EVALUATING FOREST MODELS IN A SUSTAINABLE FOREST MANAGEMENT CONTEXT. 1:13
- Montagnani L (2018) Ancillary vegetation measurements at ICOS ecosystem stations. *International Agrophysics* 32:645–664
- Morrison IK (2011) Effect of trap dimensions on mass of litterfall collected in an *Acersaccharum* stand in northern Ontario. *Canadian Journal of Forest Research*. <https://doi.org/10.1139/x91-130>
- Mussche S, Samson R, Nachtergale L, et al (2001) A comparison of optical and direct methods for monitoring the seasonal dynamics of leaf area index in deciduous forests. *Silva Fenn* 35:. <https://doi.org/10.14214/sf.575>

- Nash JE, Sutcliffe JV (1970) River flow forecasting through conceptual models part I—A discussion of principles. *Journal of hydrology* 10:282–290
- Ollinger SV (2011) Sources of variability in canopy reflectance and the convergent properties of plants. *New Phytologist* 189:375–394. <https://doi.org/10.1111/j.1469-8137.2010.03536.x>
- Oswald H (1981) résultats principaux des places d’expérience de chêne du Centre national de Recherches forestières. *RFF* 33:21
- Parker GG (2020) Tamm review: Leaf Area Index (LAI) is both a determinant and a consequence of important processes in vegetation canopies. *Forest Ecology and Management* 477:118496. <https://doi.org/10.1016/j.foreco.2020.118496>
- Peng C (2000) Understanding the role of forest simulation models in sustainable forest management. *Environmental Impact Assessment Review* 20:481–501. [https://doi.org/10.1016/S0195-9255\(99\)00044-X](https://doi.org/10.1016/S0195-9255(99)00044-X)
- Perot T, Balandier P, Couteau C, et al (2019) Transmitted light as a tool to monitor tree leaf phenology and development applied to *Quercus petraea*. *Agricultural and Forest Meteorology* 275:37–46. <https://doi.org/10.1016/j.agrformet.2019.05.010>
- Pietsch SA, Hasenauer H, Thornton PE (2005) BGC-model parameters for tree species growing in central European forests. *Forest Ecology and Management* 211:264–295. <https://doi.org/10.1016/j.foreco.2005.02.046>
- Reich PB (2012) Key canopy traits drive forest productivity. *Proceedings of the Royal Society B: Biological Sciences* 279:2128–2134. <https://doi.org/10.1098/rspb.2011.2270>
- Reineke LH (1933) Perfecting a stand-density index for even-aged forests
- Running SW, Coughlan JC (1988) A general model of forest ecosystem processes for regional applications I. Hydrologic balance, canopy gas exchange and primary production processes. *Ecological Modelling* 42:125–154. [https://doi.org/10.1016/0304-3800\(88\)90112-3](https://doi.org/10.1016/0304-3800(88)90112-3)
- Running SW, Gower ST (1991) FOREST-BGC, a general model of forest ecosystem processes for regional applications. II. Dynamic carbon allocation and nitrogen budgets. *Tree physiology* 9:147–160
- Seynave I, Bailly A, Balandier P, et al (2018) GIS Coop: networks of silvicultural trials for supporting forest management under changing environment. *Annals of Forest Science* 75:48. <https://doi.org/10.1007/s13595-018-0692-z>
- Skovsgaard JP, Vanclay JK (2008) Forest site productivity: a review of the evolution of dendrometric concepts for even-aged stands. *Forestry* 81:13–31. <https://doi.org/10.1093/forestry/cpm041>
- Sonohat G, Balandier P, Ruchaud F (2004) Predicting solar radiation transmittance in the understory of even-aged coniferous stands in temperate forests. *Annals of Forest Science* 61:629–641
- Stage AR (1973) Prognosis model for stand development. Intermountain Forest & Range Experiment Station, Forest Service, US ...
- Verhoef W (1984) Light scattering by leaf layers with application to canopy reflectance modeling: The SAIL model. *Remote sensing of environment* 16:125–141

Verhoef W (1985) Earth observation modeling based on layer scattering matrices. *Remote sensing of environment* 17:165–178

Vose JM, Clinton BD, Sullivan NH, Bolstad PV (1995) Vertical leaf area distribution, light transmittance, and application of the Beer–Lambert Law in four mature hardwood stands in the southern Appalachians. *Canadian Journal of Forest Research*.  
<https://doi.org/10.1139/x95-113>

Weiss M, Baret F, Smith GJ, et al (2004) Review of methods for in situ leaf area index (LAI) determination. *Agricultural and Forest Meteorology* 121:37–53.  
<https://doi.org/10.1016/j.agrformet.2003.08.001>

Welles JM (1990) Some indirect methods of estimating canopy structure. *Remote sensing reviews* 5:31–43

Welles JM, Cohen S (1996) Canopy structure measurement by gap fraction analysis using commercial instrumentation. *J Exp Bot* 47:1335–1342.  
<https://doi.org/10.1093/jxb/47.9.1335>

Wilson JW (1960) Inclined point quadrats. *New Phytologist* 59:1–7

Yan H, Wang SQ, Billesbach D, et al (2012) Global estimation of evapotranspiration using a leaf area index-based surface energy and water balance model. *Remote Sensing of Environment* 124:581–595. <https://doi.org/10.1016/j.rse.2012.06.004>
